# Supplementary material for: Attenuating persistent sodium current–induced atrial myopathy and fibrillation by preventing mitochondrial oxidative stress
Source: PubMed Central journal article supplement (PMC8675199; doi:10.1172/jci.insight.147371), 2021-10-28
Supplement: jciinsight-6-147371-s038.pdf [file jciinsight-6-147371-s038.pdf]

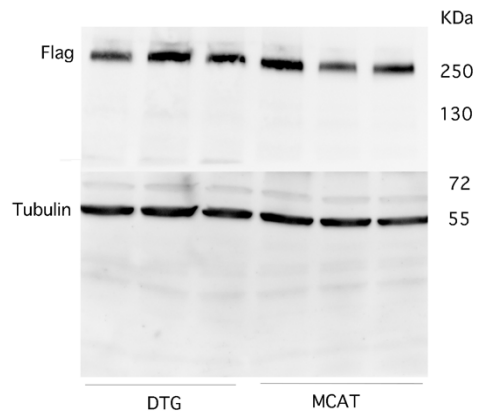

Unedited gel for Figure 1  
(Nitrocellulose cut before blotting  
top blotted with Anti-FLAG Ab  
bottom blotted with anti-Tubulin Ab)

Unedited gels Figure 4

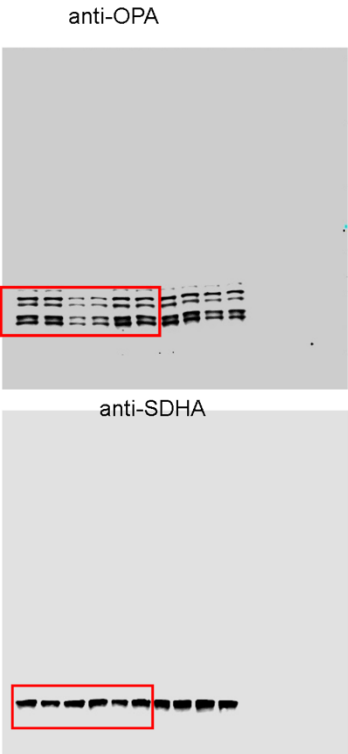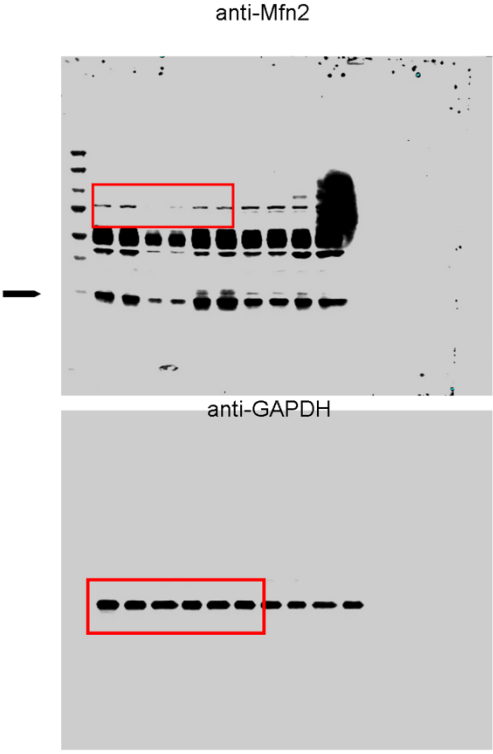

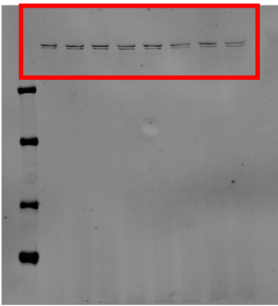

anti-RyR blot

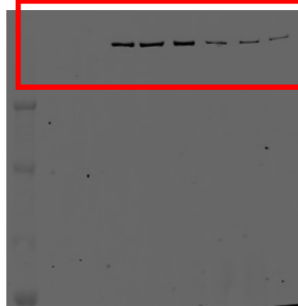

anti-DNP

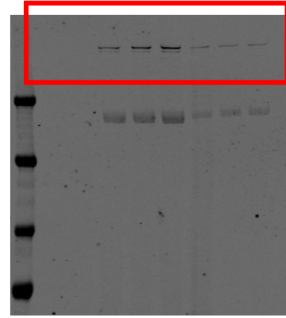

anti-p2808

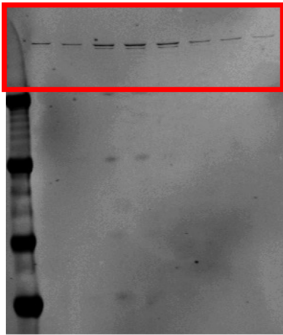

anti-p2814

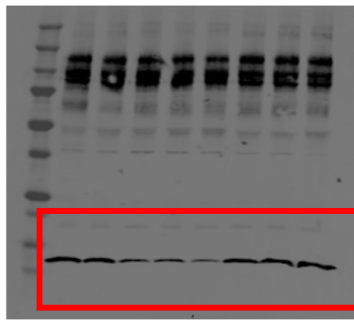

anti-calstabin

Unedited gels for Figure 8
